# Supplementary material for: Production of biochars from Ca impregnated ramie biomass (Boehmeria nivea (L.) Gaud.) and their phosphate removal potential
Source: Royal Society of Chemistry journal article supplement (doi:10.1039/c5ra22142k), 2016-01-01
Supplement: c5ra22142k1.pdf [file c5ra22142k1.pdf]

Supplementary material for:

Production of biochars from Ca impregnated ramie biomass (*Boehmeria nivea* (L.)  
Gaud.) and their phosphate removal potential

2 figures

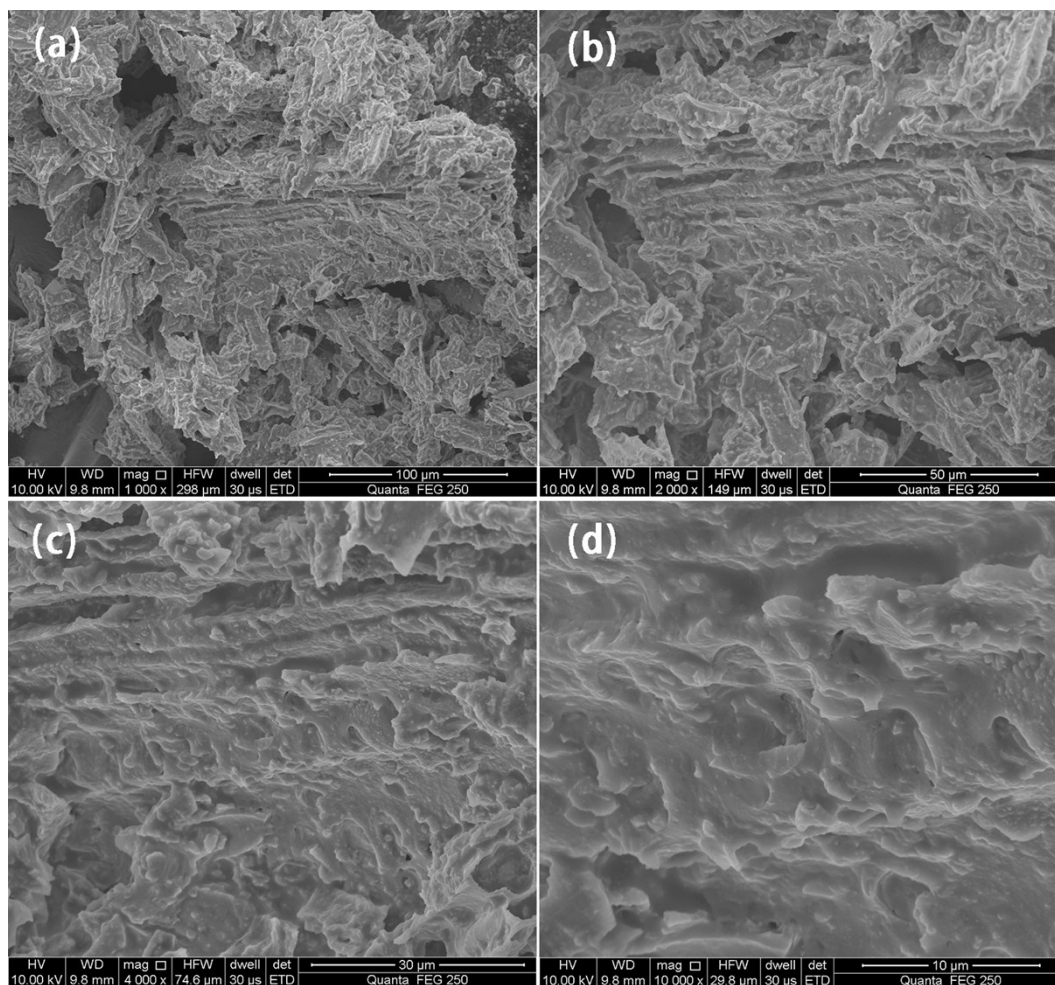

Fig. S1. The SEM images of Ca-RSB.

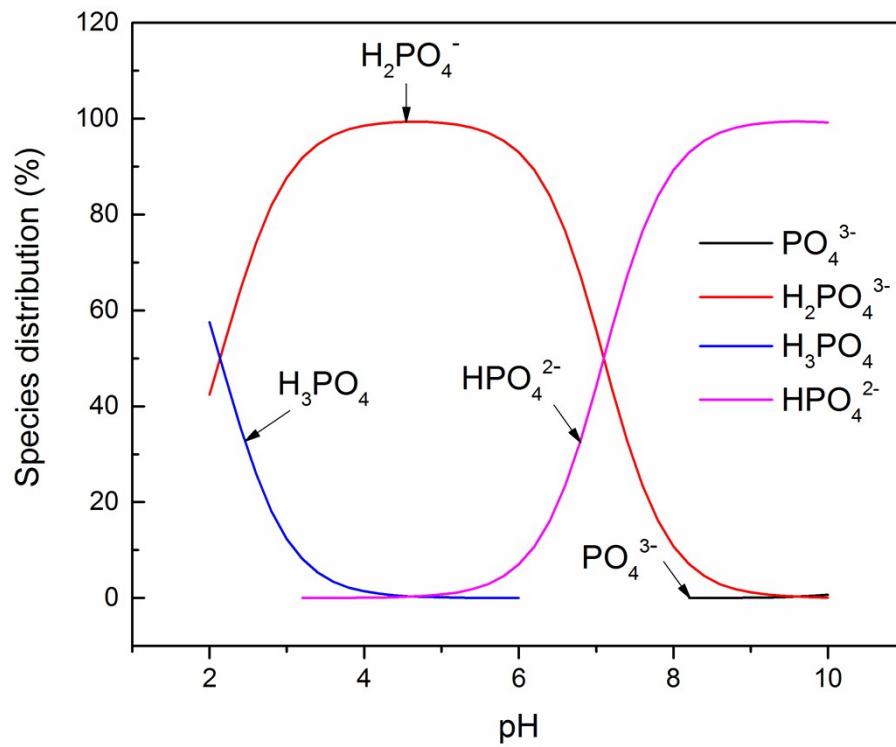

**Fig. S2.** Distribution of phosphate species as predicted by Visual MINTEQ:  $C_0$  (phosphate) = 100 mg/L,  $T = 299$  K.
